# Supplementary material for: Fossil evidence for vampire squid inhabiting oxygen-depleted ocean zones since at least the Oligocene
Source: PubMed Central journal article supplement (PMC7893013; doi:10.1038/s42003-021-01714-0), 2021-02-18
Supplement: 42003_2021_1714_MOESM2_ESM.pdf [file 42003_2021_1714_MOESM2_ESM.pdf]

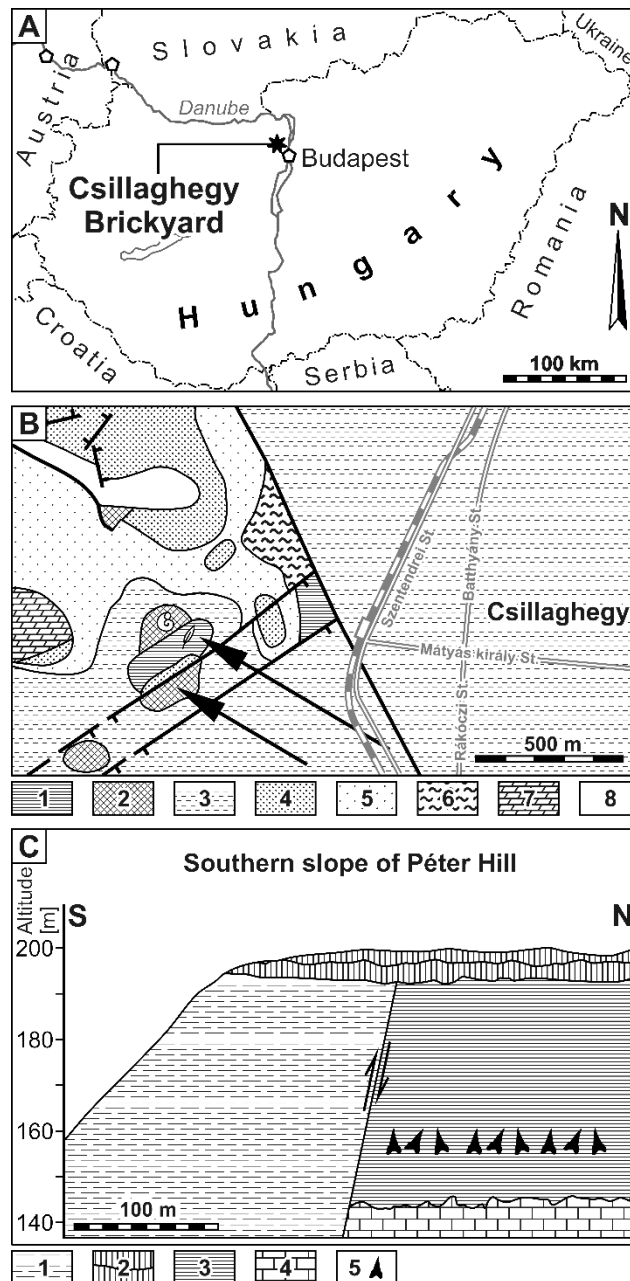

**Supplementary Fig. 1.** **a** Geographical position of the once existing Csillag-hegy brickyard (asterisk). **b** The surface outcrops of Oligocene formations surrounded by Eocene and Triassic rocks in the vicinity of the settlement Csillaghegy. The shorter and longer arrows mark the former outcrop of the the Kiscell Clay Fm. and Tard Clay Fm. (Csillag-hegy brickyard). 1) Oligocene Tard Clay Fm. (surface). 2) Oligocene Kiscell Clay Fm. (surface). 3) Oligocene Kiscell Clay Fm. (covered). 4) Eocene conglomerate, limestone with *Nummulites* or *Discocyliina*, bryozoan marl (surface). 5) Eocene conglomerate, limestone with *Nummulites* or *Discocyliina*, bryozoan marl (covered). 6) Eocene Buda Marl Fm. 7) Triassic grey dolomite (Hauptdolomite). 8) Triassic Diplopora Dolomite. **c** Geological profile of the former Csillag-hegy brickyard after<sup>79</sup>. The exact level of the *Necroteuthis* specimens within the Tard Clay Fm. is unknown. 1) Kiscell Clay Fm., 2) travertine, 3) Tard Clay Fm., 4) Upper Eocene carbonates, 5) level with abundant shark teeth in the lower part of the Tard Clay Fm.

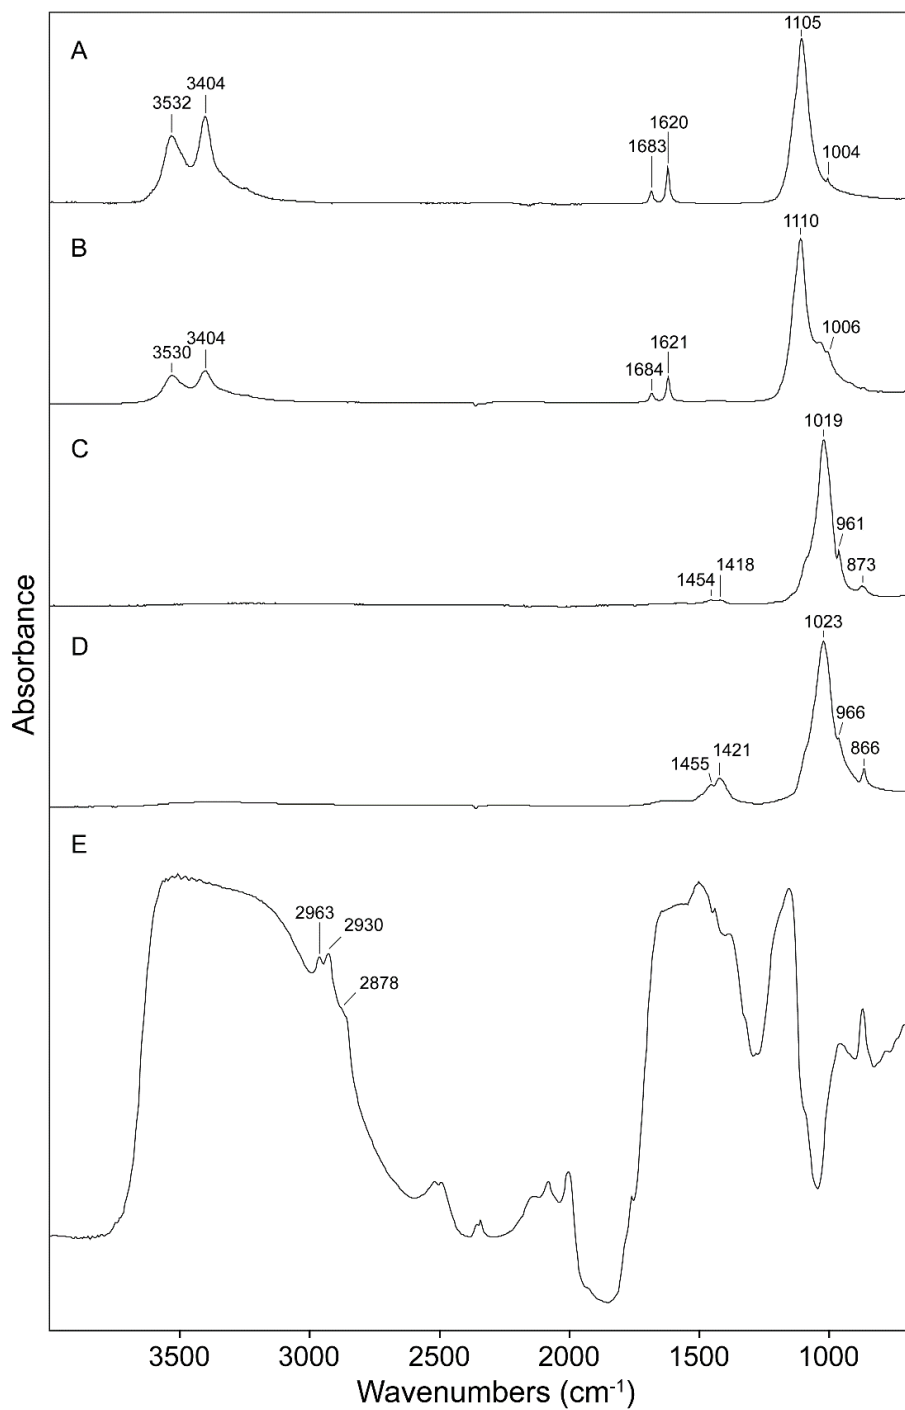

**Supplementary Fig. 2.** Recorded infrared spectra and reference spectra (Fourier-transform Infrared spectroscopy - FTIR). **a** reference spectrum of gypsum RRUFF R040029-1, **b** recorded spectrum of gypsum, **c** reference spectrum of (hydroxyl)apatite R050512-1, **d** recorded spectrum of (hydroxyl)apatite, **e** recorded spectrum of a mixture of fossilized/altered organic matter.

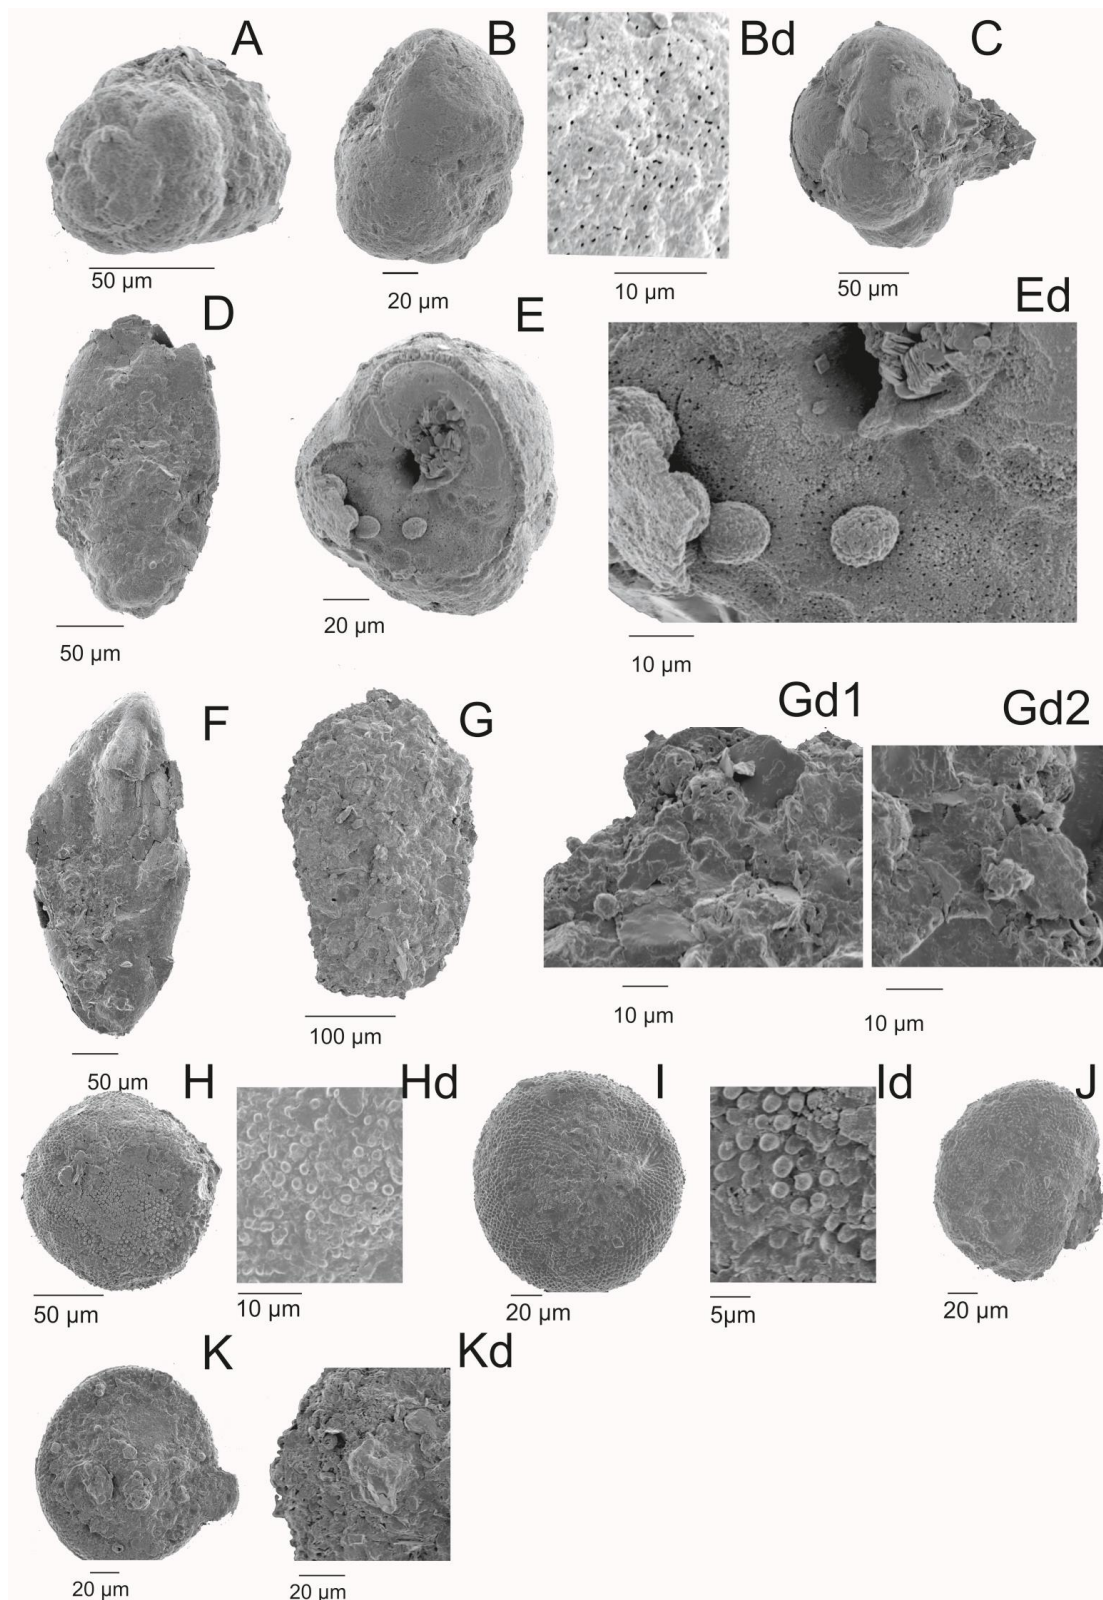

**Supplementary Fig. 3.** **a-e** *Caucasina* sp. cf. *Caucasina schischkinskayae* **bd** – detail of densely porous test. **d** Collapsed younger chambers in larger adult specimen. **e** Bacterial activity signs, inner septum with framboidal pyrite pseudomorphoses after bacteria (**ed**). **f** *Fursenkoina acuta* (compressed). **g** ?*Miliammina* sp. **gd1**, **gd2** Nannofossils incorporated into the test wall. **h-k** *Tasmanites* sp. **hd**, **id** Details of the external wall structure. **j** Inner cavity. **k**, **kd** Calcareous nannoplankton crust (integument) on the *Tasmanites* sp. wall.

## Supplementary Micro CT imaging:

The micro-computed tomography images generated during and/or analysed during the current study are available in the figshare repository: <https://doi.org/10.6084/m9.figshare.13526024><sup>90</sup>. The *Necroteuthis* holotype which is the subject of the imaging is housed in the Hungarian Natural History Museum under item: No. M59/4672.

## Supplementary Tables 1-3.

|                                                                                              | Sample 1 | Sample 2 | Sample 3 | Sample 4 | Sample 5 |            |
|----------------------------------------------------------------------------------------------|----------|----------|----------|----------|----------|------------|
| <i>Coccolithus pelagicus</i> (Wallich 1877) Schiller, 1930                                   | 11.18    | 36.07    | 56.99    | 43.00    | 32.73    | NP2-Recent |
| <i>Coronocyclus nitescens</i> (Kamptner, 1963) Bramlette and Wilcoxon, 1967                  | 0.74     | 0.00     | 0.00     | 2.00     | 0.00     | NP15-NN6   |
| <i>Coronocyclus nitescens</i> (Kamptner, 1963) Bramlette and Wilcoxon, 1967                  | 0.00     | 0.00     | 1.08     | 0.00     | 0.00     | NP15-NN6   |
| <i>Cyclicargolithus floridanus</i> (Roth & Hay, in Hay et al., 1967) Bukry, 1971             | 2.94     | 1.64     | 0.00     | 1.00     | 0.91     | NP15-NN7   |
| <i>Discoaster nodifer</i> (Bramlette & Riedel, 1954) Bukry, 1973                             | 0.74     | 0.00     | 0.00     | 0.00     | 0.00     | NP14-NP23  |
| <i>Helicosphaera bipuncta</i> de Kaenel & Bergen, in Boesiger et al. 2017                    | 0.93     | 0.00     | 0.00     | 2.00     | 0.91     | NP22-NN4   |
| <i>Pontosphaera enormis</i> (Locker, 1967) Perch-Nielsen, 1984                               | 0.52     | 0.00     | 0.00     | 0.00     | 0.00     | NP10-NP25  |
| <i>Pontosphaera latielectica</i> (Baldi-Beke, in Baldi-Beke & Baldi 1974) Perch-Nielsen 1984 | 1.47     | 0.00     | 0.00     | 1.00     | 1.82     | NP10-NP24  |
| <i>Reticulofenestra bisecta</i> (Hay, Mohler and Wade, 1966) Roth, 1970                      | 0.00     | 0.00     | 0.85     | 0.00     | 0.00     | NP17-NN1   |
| <i>Reticulofenestra daviesii</i> (Haq, 1968) Haq, 1971                                       | 0.74     | 0.92     | 1.30     | 4.00     | 0.91     | NP14-NN2   |
| <i>Reticulofenestra lockeri</i> Müller, 1970                                                 | 8.54     | 6.56     | 0.00     | 20.00    | 18.18    | NP17-NN2   |
| <i>Reticulofenestra minuta</i> Roth, 1970                                                    | 5.88     | 2.36     | 0.00     | 2.00     | 0.00     | NP13-NN16  |
| <i>Reticulofenestra ornata</i> Müller 1970                                                   | 65.44    | 52.46    | 38.71    | 20.00    | 40.91    | NP22-NP24  |
| <i>Reticulofenestra umbilicus</i> (Levin, 1965) Martini & Ritzkowski, 1968                   | 0.00     | 0.00     | 0.00     | 0.00     | 1.82     | NP16--NP22 |
| <i>Sphenolithus moriformis</i> (Brönnimann & Stradner, 1960) Bramlette & Wilcoxon, 1967      | 0.00     | 0.00     | 0.00     | 0.00     | 0.91     | NP5-NN15   |
| <i>Sphenolithus pseudoradians</i> Bramlette & Wilcoxon, 1967                                 | 0.89     | 0.00     | 0.00     | 0.00     | 0.00     | NP15-NP24  |
| <i>Syracosphaera</i> sp.                                                                     | 0.00     | 0.00     | 0.00     | 5.00     | 0.91     |            |
| <i>Thoracosphaera</i> sp.                                                                    | 0.00     | 0.00     | 1.08     | 0.00     | 0.00     |            |

**Supplementary Table 1:** Diversity, abundance and stratigraphic distribution of calcareous nannofossils recorded from *Necroteuthis*-bearing sediment.

| locality    | No. level | sample  | $\delta^{13}\text{C}_{\text{carb}}$ | $\delta^{18}\text{O}_{\text{carb}}$ | StDev C | StDev O |
|-------------|-----------|---------|-------------------------------------|-------------------------------------|---------|---------|
| Csillaghegy | JS1       | 2622.15 | -2.27                               | -5.87                               | 0.011   | 0.022   |
| Csillaghegy | JS2       | 3031.32 | -2.46                               | -6.01                               | 0.010   | 0.014   |
| Csillaghegy | JS3       | 2444.14 | -2.38                               | -5.39                               | 0.011   | 0.029   |
| Csillaghegy | JS4       | 4228.73 | -2.41                               | -5.74                               | 0.016   | 0.020   |
| Csillaghegy | JS5       | 2781.15 | -2.34                               | -5.64                               | 0.008   | 0.030   |
| Csillaghegy | JS6       | 2394.42 | -2.50                               | -5.72                               | 0.006   | 0.010   |
| Csillaghegy | JS7       | 1428.39 | -2.50                               | -5.56                               | 0.009   | 0.013   |
| Csillaghegy | JS8       | 2325.24 | -2.49                               | -5.58                               | 0.013   | 0.035   |
| Csillaghegy | JS9       | 4039.36 | -2.45                               | -5.15                               | 0.008   | 0.005   |
| Csillaghegy | JS10      | 3751.30 | -2.45                               | -5.38                               | 0.011   | 0.013   |
| Csillaghegy | JS11      | 3440.80 | -2.59                               | -5.57                               | 0.008   | 0.013   |
| Csillaghegy | JS12      | 3051.95 | -2.40                               | -5.32                               | 0.017   | 0.011   |
| Csillaghegy | JS13      | 2003.81 | -2.61                               | -6.13                               | 0.016   | 0.016   |
| Csillaghegy | JS14      | 1846.05 | -3.25                               | -5.92                               | 0.020   | 0.025   |
| Csillaghegy | JS15      | 1802.10 | -2.48                               | -5.39                               | 0.026   | 0.023   |
| Csillaghegy | JS16      | 1891.25 | -2.45                               | -5.49                               | 0.032   | 0.036   |
| Csillaghegy | JS17      | 3066.10 | -0.93                               | -2.73                               | 0.041   | 0.028   |
| Csillaghegy | JS18      | 3190.09 | -0.98                               | -2.01                               | 0.022   | 0.039   |
| Csillaghegy | JS19      | 3646.33 | -1.08                               | -1.99                               | 0.022   | 0.013   |

**Supplementary Table 2:** Table of measured stable isotopes  $\delta^{13}\text{C}_{\text{carb}}$  and  $\delta^{18}\text{O}_{\text{carb}}$  from the bulk rock of *Necroteuthis*-bearing specimen (blue – Tard Clay Fm.) and overlying Kiscell Clay Fm. yielding *Archaeosepia* cuttlebones (green). Level with gladius highlighted by grey.

| No. analysis | No. Peak | Nr | Rt    | Ampl 44 | BGD 44 | Area All | $\delta^{13}\text{C}/\delta^{12}\text{C}$ | $\delta^{13}\text{C}_{\text{org}}$ |
|--------------|----------|----|-------|---------|--------|----------|-------------------------------------------|------------------------------------|
| 82009        | JS1      | 3  | 165.9 | 3841    | 10.9   | 71.768   | -26.7229                                  | -26.75                             |
| 82010        | JS2      | 3  | 165.1 | 3467    | 10.4   | 64.622   | -26.6731                                  | -26.72                             |
| 82011        | JS3      | 3  | 165.3 | 4211    | 10.6   | 78.555   | -26.8036                                  | -26.80                             |
| 82012        | JS4      | 3  | 165.1 | 3698    | 10.7   | 69.137   | -26.7638                                  | -26.76                             |
| 82013        | JS5      | 3  | 165.5 | 3303    | 10.6   | 62.035   | -26.8126                                  | -26.81                             |
| 82014        |          | 3  | 165.3 | 3800    | 10.3   | 71.299   | -26.8724                                  | -26.87                             |
| 82015        | JS7      | 3  | 165.1 | 3406    | 10.7   | 63.637   | -26.9282                                  | -26.93                             |
| 82016        | JS8      | 3  | 165.1 | 3752    | 10.8   | 70.184   | -27.0627                                  | -27.06                             |
| 82017        | JS9      | 3  | 165.3 | 3500    | 10.2   | 65.3     | -26.6372                                  | -26.64                             |
| 82018        | JS10     | 3  | 165.3 | 3346    | 10.2   | 62.783   | -26.8007                                  | -26.80                             |
| 82019        | JS11     | 3  | 165.5 | 3264    | 10.0   | 61.167   | -26.7319                                  | -26.73                             |
| 82020        | JS12     | 3  | 164.7 | 3748    | 10.4   | 69.712   | -26.7389                                  | -26.74                             |
| 82021        | JS13     | 3  | 164.9 | 3274    | 10.4   | 60.656   | -26.7269                                  | -26.73                             |
| 82022        | JS14     | 3  | 165.5 | 3181    | 10.1   | 60.768   | -26.4558                                  | -26.46                             |
| 82023        | JS15     | 3  | 165.7 | 4118    | 10.2   | 77.684   | -27.0697                                  | -27.07                             |
| 82024        | JS16     | 3  | 164.9 | 3387    | 10.5   | 63.312   | -26.8644                                  | -26.86                             |
| 82025        | JS1      | 3  | 165.3 | 4188    | 10.3   | 78.645   | -26.7678                                  | control                            |
| 82026        | JS2      | 3  | 165.3 | 4046    | 10.0   | 75.666   | -26.7638                                  | control                            |

**Supplementary Table 3:** Table of measured stable isotope  $\delta^{13}\text{C}_{\text{org}}$  from the bulk rock of *Necroteuthis*-bearing specimen. Level with gladius highlighted by grey.
